# Supplementary material
Source: HighWire-hosted journal article supplement (https://cmaj.ca/highwire/filestream/58475/field_highwire_adjunct_files/2/mile-app3.pdf)

**Appendix 3:** Cumulative probability of attaining each milestone of smoking onset in subgroup of participants who reported inhaling into lungs ( $n = 253$ ), according to number of months after first inhalation. (See Methods of main article for definitions of milestones [available at [www.cmaj.ca/cgi/content/full/175/3/255](http://www.cmaj.ca/cgi/content/full/175/3/255)].)

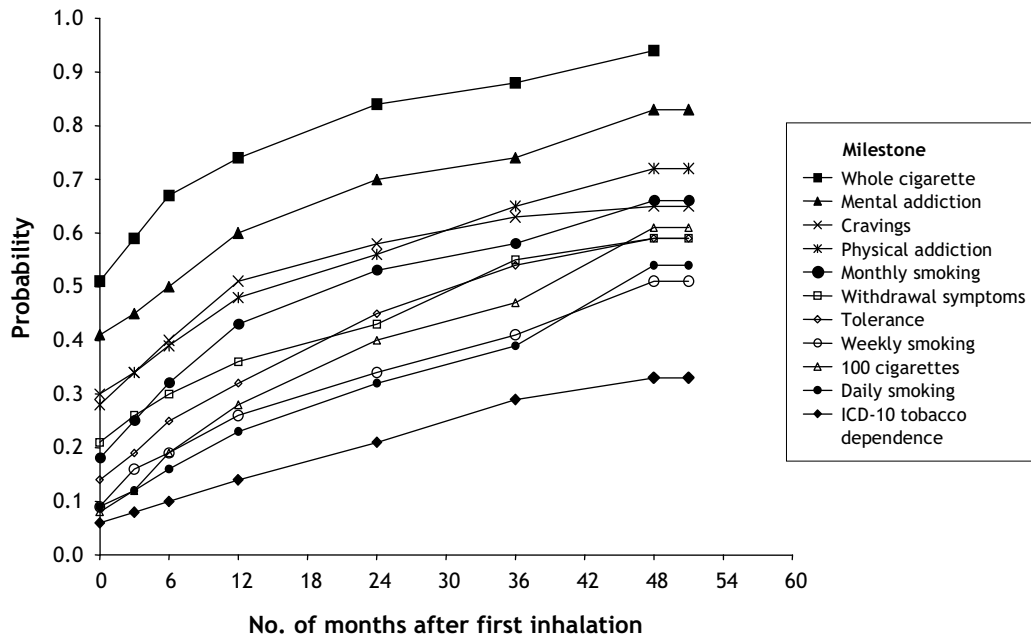

Supplement: mile-app3.pdf [file mile-app3.pdf]
